# Supplementary material for: Facile synthesis of MOF-derived ultrafine Co nanocrystals embedded in a nitrogen-doped carbon matrix for the hydrogen evolution reaction
Source: Royal Society of Chemistry journal article supplement (doi:10.1039/c6ra10020a), 2016-01-01
Supplement: c6ra10020a1.pdf [file c6ra10020a1.pdf]

# **Facile synthesis of MOF-derived ultrafine Co nanocrystals embedded in nitrogen-doped carbon matrix for the hydrogen evolution reaction**

Fangcai Zheng,<sup>a,b,c</sup> Hongyu Xia,<sup>a\*</sup> Shihao Xu,<sup>a</sup> Rencui Wang<sup>a</sup> and Yuanguang Zhang<sup>a</sup>

<sup>a</sup> Anhui Key Laboratory of Functional Coordination Compounds, School of Chemistry and Engineering, Anqing Normal University, Anqing 246011, PR China

<sup>b</sup> High Magnetic Field Laboratory, Hefei Institute of Physical Science, Chinese Academy of Science, Hefei 230031, PR China

<sup>c</sup> Shanghai Key Laboratory of Materials Protection and Advanced Materials in Electric Power, Shanghai 200090, PR China

---

\* xiahy@aqtc.edu.cn

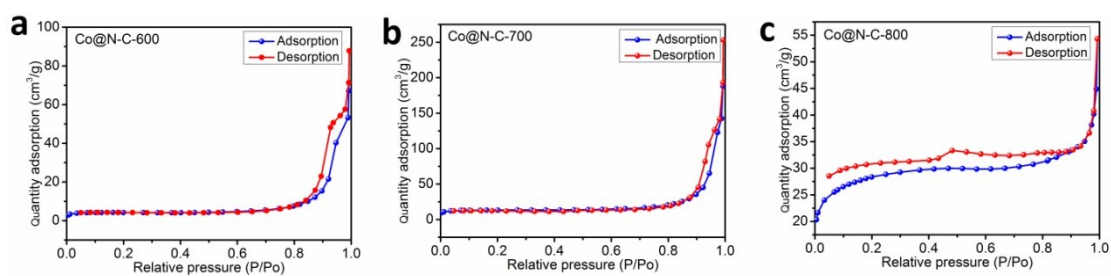

**Figure S1.** Nitrogen adsorption/desorption curves for Co@N-C-600, Co@N-C-600, and Co@N-C-600, respectively.

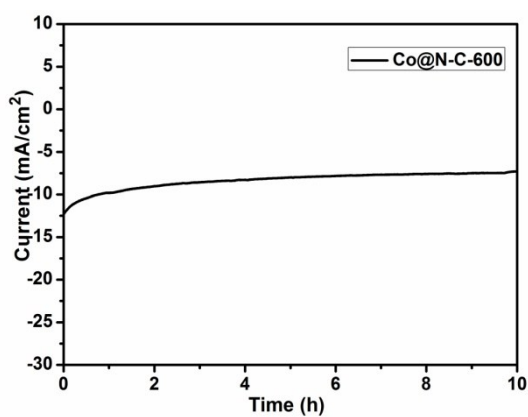

**Figure S2.** Time-dependent current density curve (i-t curve) under static overpotential of 100 mV vs RHE for 10h.

**Table S1.** BET specific surface area and pore size for Co@N-C-600, Co@N-C-600, and Co@N-C-600, respectively.

| Samples    | BET surface area                    | Pore diameter |
|------------|-------------------------------------|---------------|
| Co@N-C-600 | 14.1 m <sup>2</sup> g <sup>-1</sup> | 23.4 nm       |
| Co@N-C-700 | 44.3 m <sup>2</sup> g <sup>-1</sup> | 17.2 nm       |
| Co@N-C-800 | 97.4 m <sup>2</sup> g <sup>-1</sup> | 2.4 nm        |
